# Supplementary material
Source: PubMed Central journal article supplement (PMC5809698)
Supplement: JB.00521-17_zjb004184624s1.pdf [file JB.00521-17_zjb004184624s1.pdf]

Figure S1

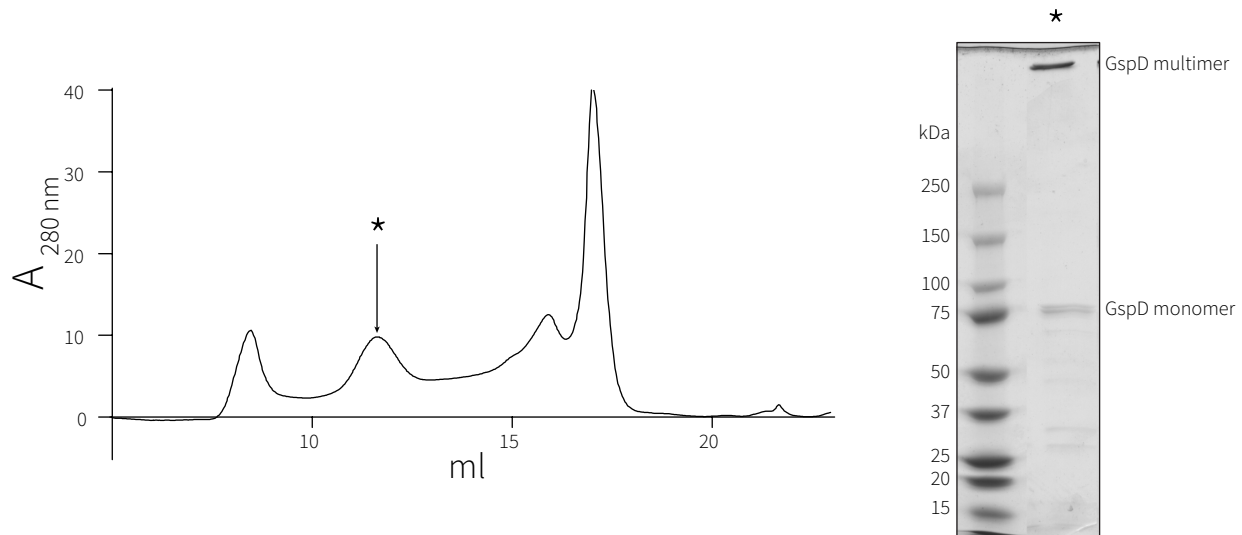

**Figure S1.** Superose 6 10/300 size exclusion chromatography  $A_{280\text{nm}}$  trace of Amphipol A8-35 stabilised EPEC GspD. The peak corresponding to the multimeric protein (\*) was subjected to SDS-PAGE to assess its purity. The heat stable GspD multimer and monomeric form can be observed.

Figure S2A

T2SS GspD *EPEC*

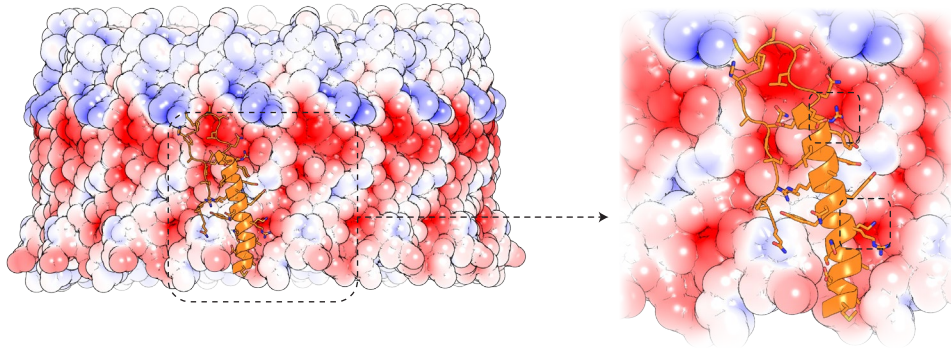

(A)Lys598-(A)Glu326

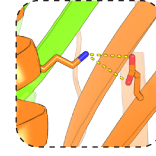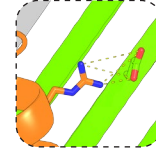

(A)Arg609-(O)Glu334

T2SS GspD *Vibrio cholerae*

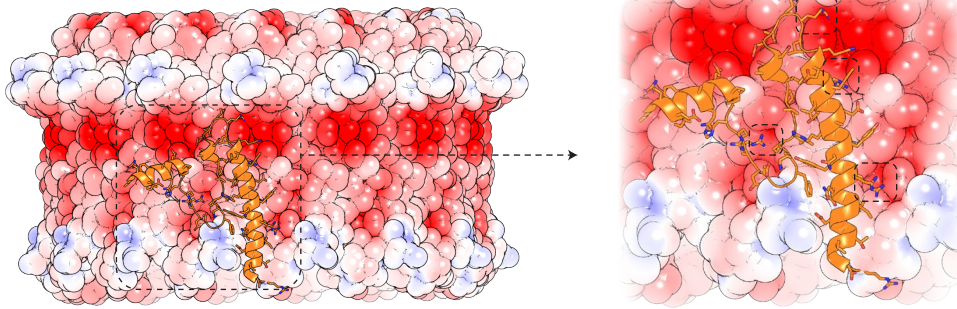

(A)Lys599-(A)Glu323

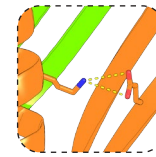

(A)Arg610-(O)Glu331

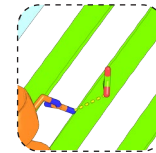

(A)Arg616<<sup>(N)</sup>Glu547  
(N)Glu549

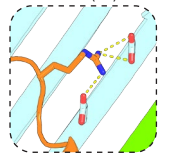

(A)Arg633-(N)Glu543

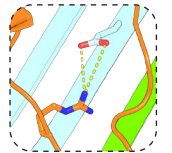

T2SS GspD *E. coli* K-12

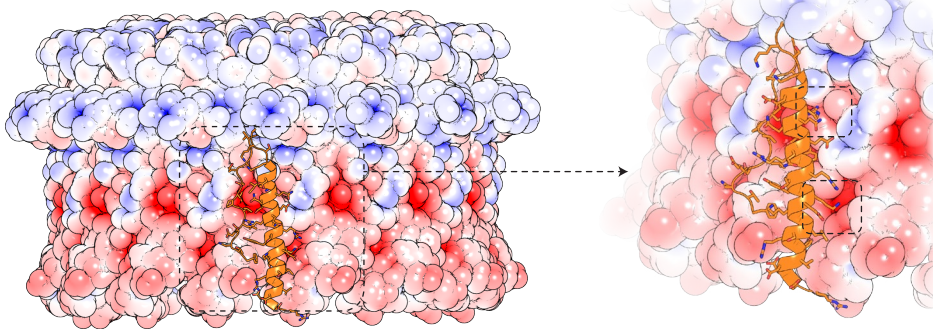

(A)Lys584-(A)Glu328

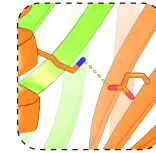

(A)Arg595-(O)Asp336

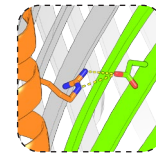

T3SS InvG *Salmonella enterica*

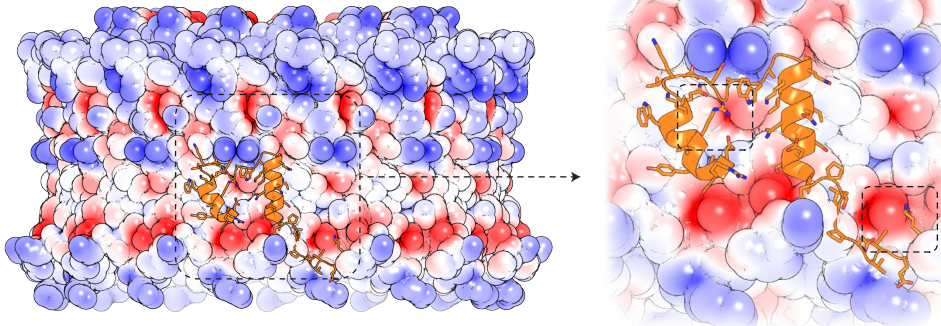

(A)Lys516-(A)Glu305

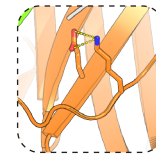

(A)Lys551-(N)Asp455

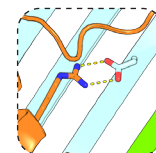

Figure S2B

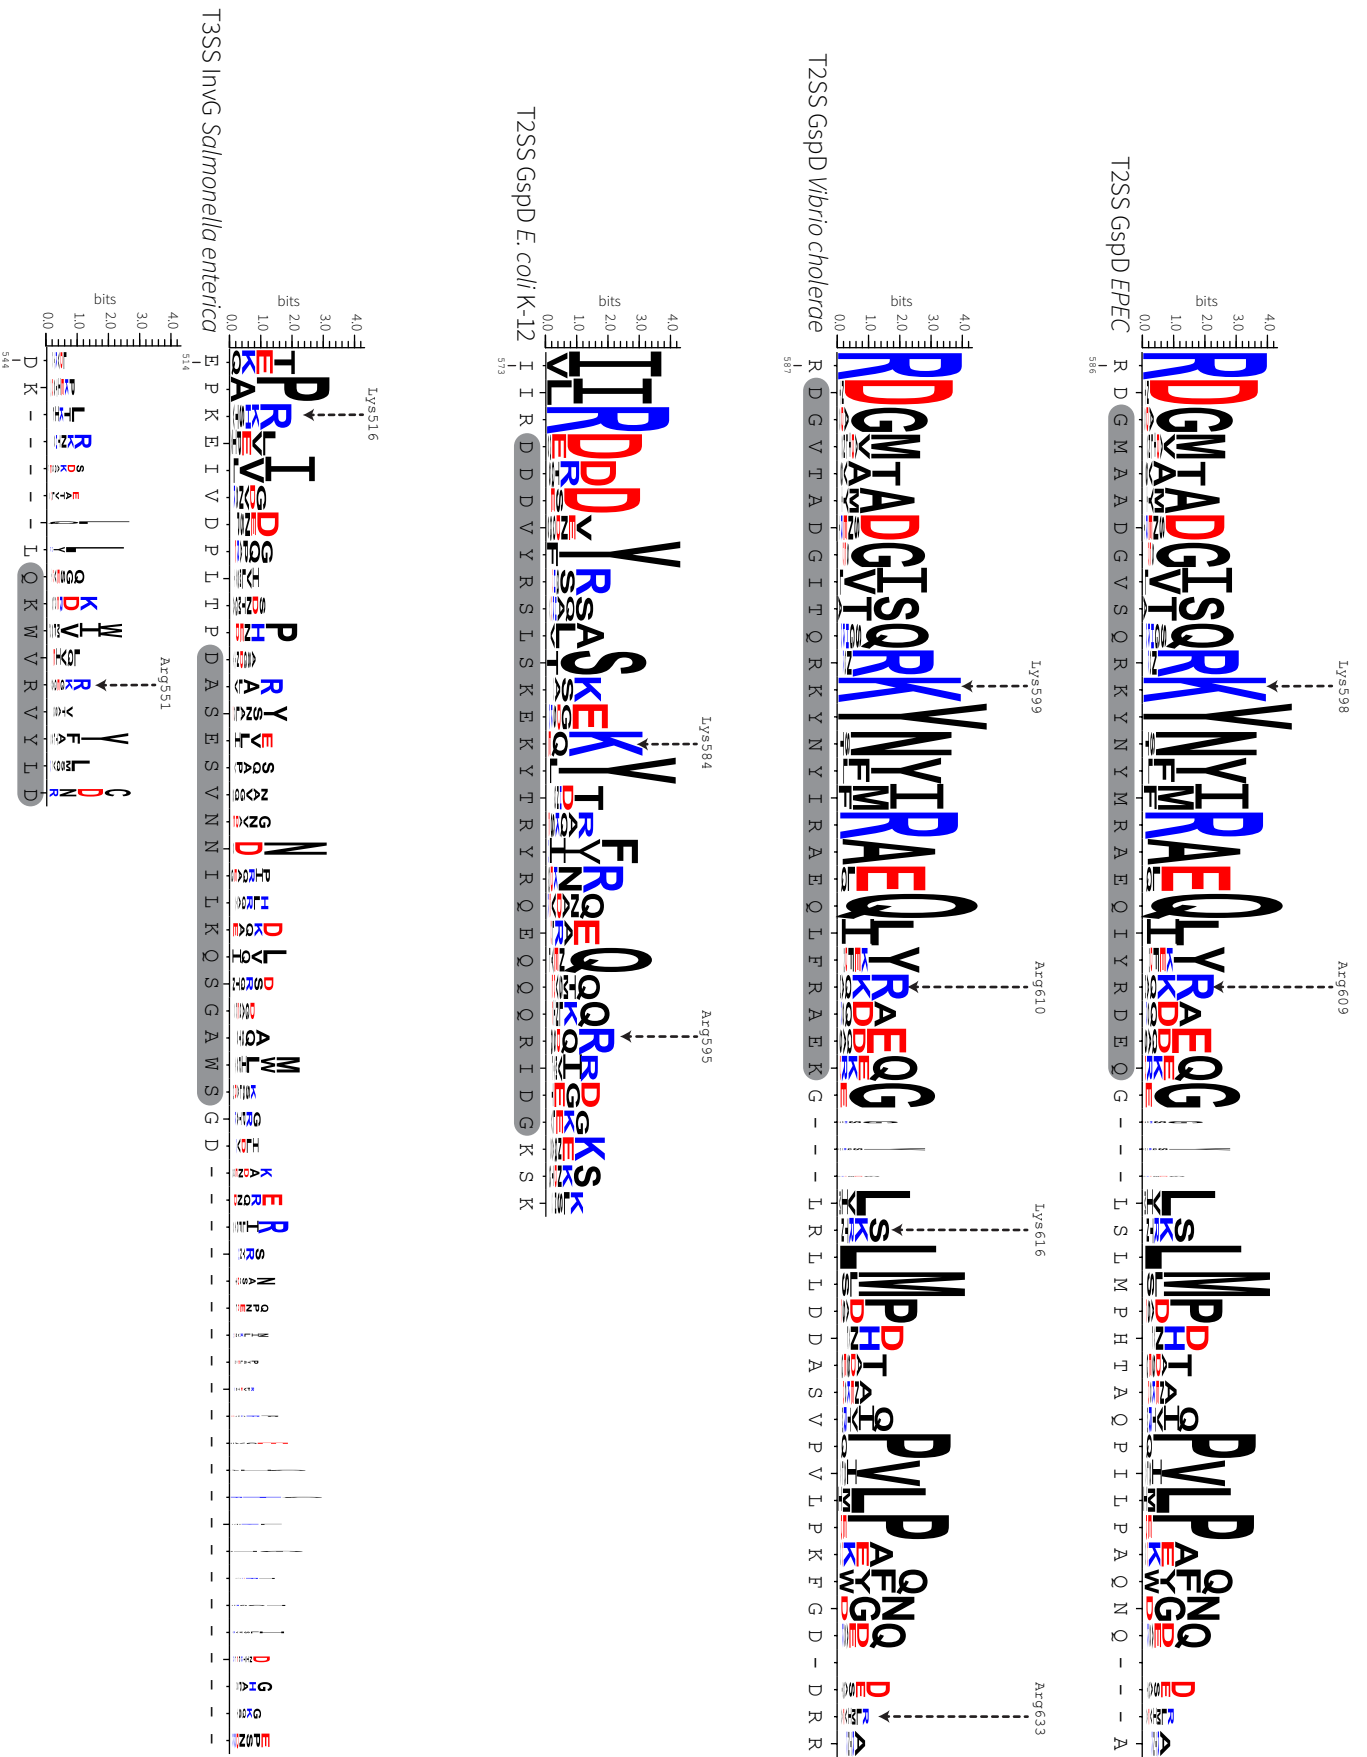

**Figure S2.** (A) Locking down the S-domain onto the T2SS secretin complex. The secretin multimeric  $\beta$ -barrel is locked together by two conserved salt bridges. The structures of the four known secretin barrels (EPEC T2SS GspD, *Vibrio cholera* T2SS GspD, *E. coli* K12 T2SS GspD, and *Salmonella enterica* T3SS InvG) are presented with their surface rendered with their electrostatic potentials shown (red = negative, blue = positive). The C-terminal alpha helix/helices are shown in orange. Potential salt bridges between the helix and the barrel. The subunits are colour coded (orange=chain A, green=chain O, blue=chain). The residues involved in the potential salt bridges are indicated and chain/subunit ids are shown in brackets. (B) Sequence logo of alignments of the *Vibrio* (581 sequences) and *Klebsiella*-type (363 sequences) T2SS secretins and the *Salmonella enterica* T3SS secretin (1543 sequences) C-terminal alpha helix regions. The sequence and helix location (in grey) are shown below the sequence logos. Residues involved in potential salt bridges to the  $\beta$ -barrel surface are indicated. Positive charges residues are shown in blue and negatively charged residues are shown in red.



# Figure S3

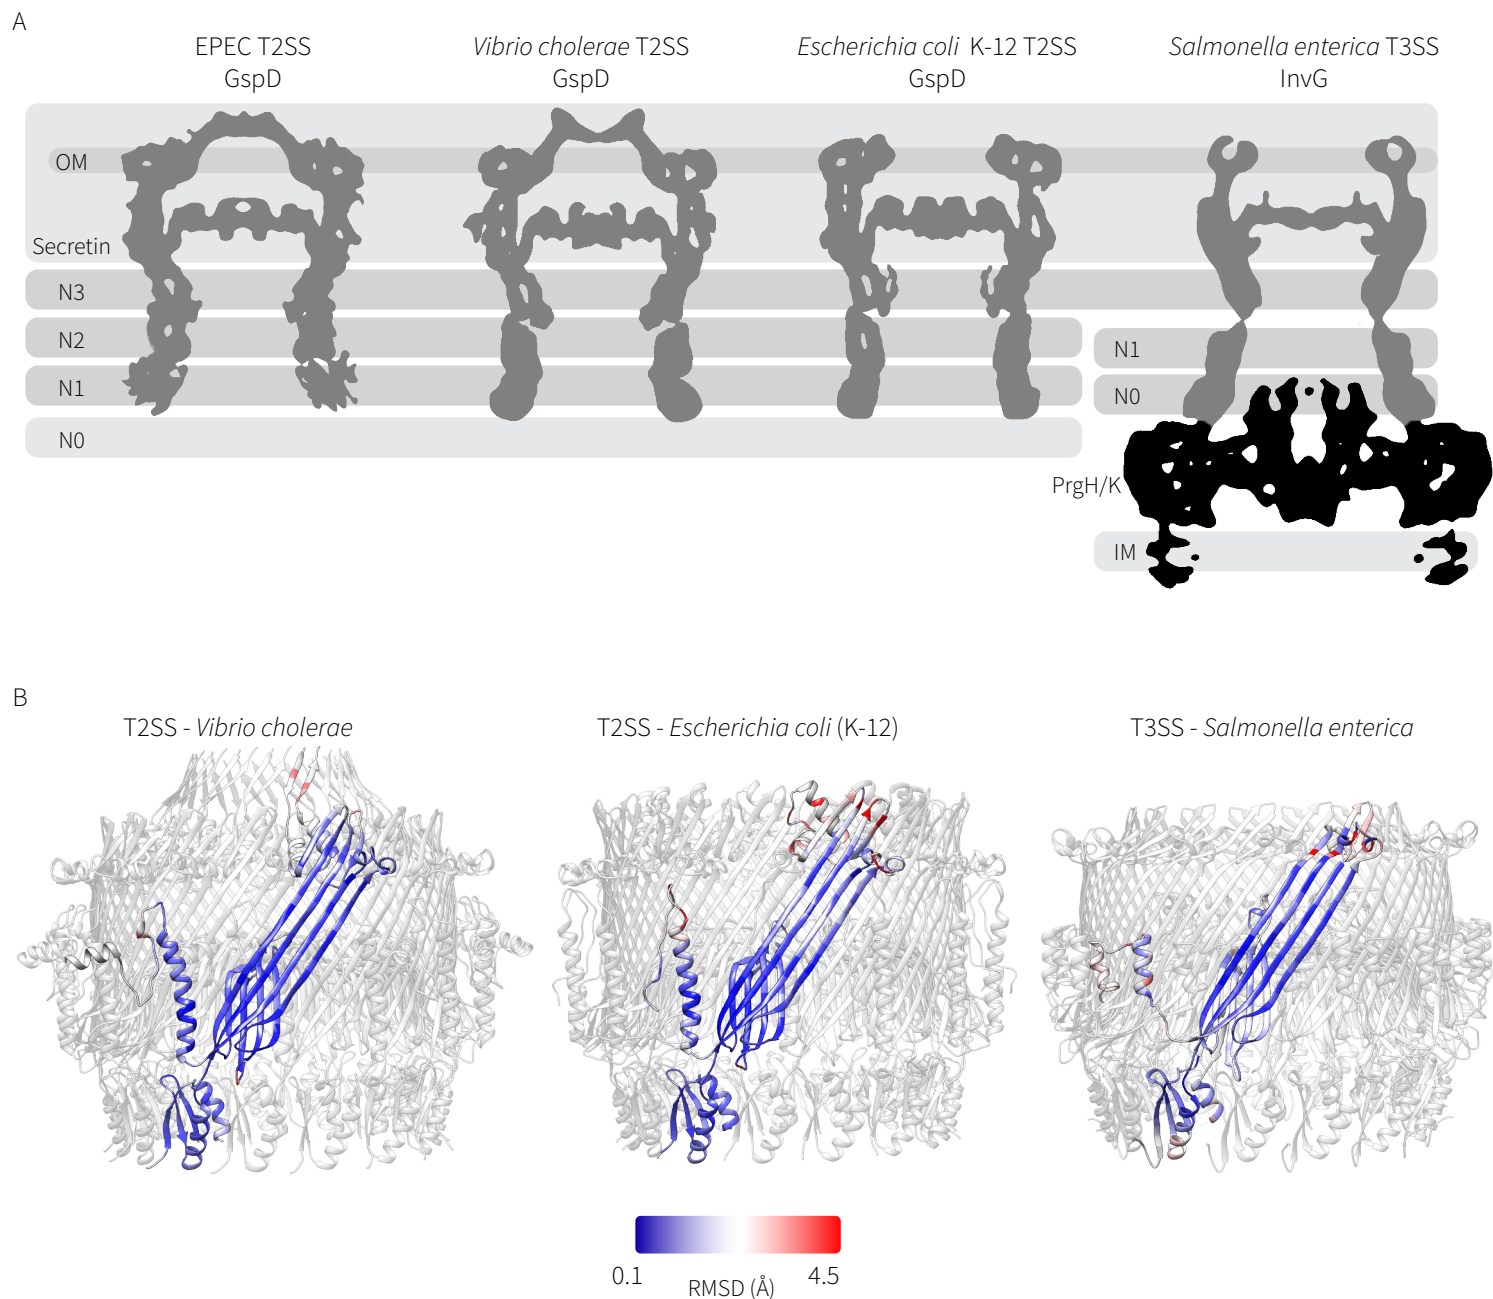

**Figure S3.** Comparison of secretin structures. **(A)** The electron density map for the EPEC secretin GspD (EMD-8779) is compared to the T2SS secretins from *V. cholerae* (EMD-6676) and *E. coli* K-12, (EMD-6675) as well as the T3SS secretin and associated basal body from *S. enterica* (EMD-8400). The maps were low-pass filtered to 7 Å and sliced through the axis of symmetry to aid in comparison. Relevant domains are highlighted where appropriate **(B)** Root-mean square deviation (RMSD) analysis comparing the T2SS secretins from *V. cholerae* (left) (PDB: 5WQ8) and *E. coli* K-12 (middle) (PDB: 5WQ7) and the T3SS secretin from *S. enterica* (PDB: 5TCQ) with the EPEC T2SS secretin from this study. A single chain from each secretin is coloured from blue to red, representing the C- $\alpha$  RMSD values from 0.1 to 4.5 Å. This was calculated in the UCSF Chimera (69) software package using the Matchmaker algorithm in conjunction with a BLOSUM-30 weighted sequence matrix.

Figure S4

A

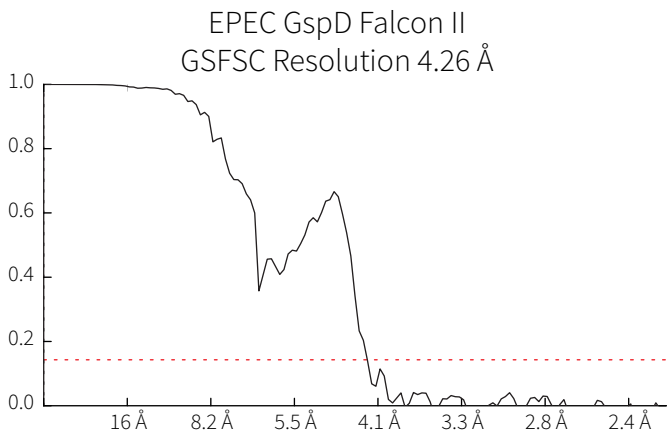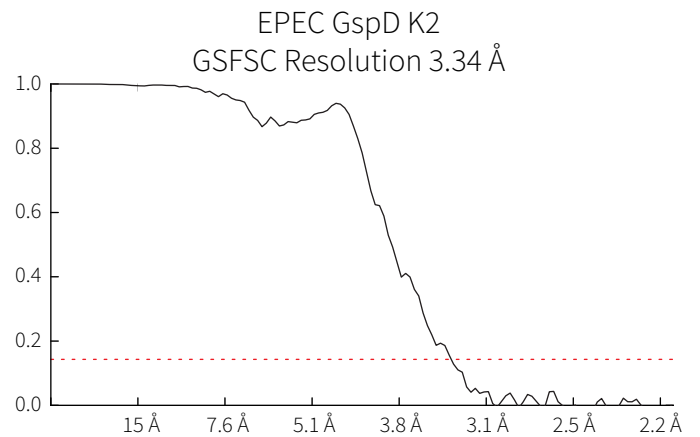

B

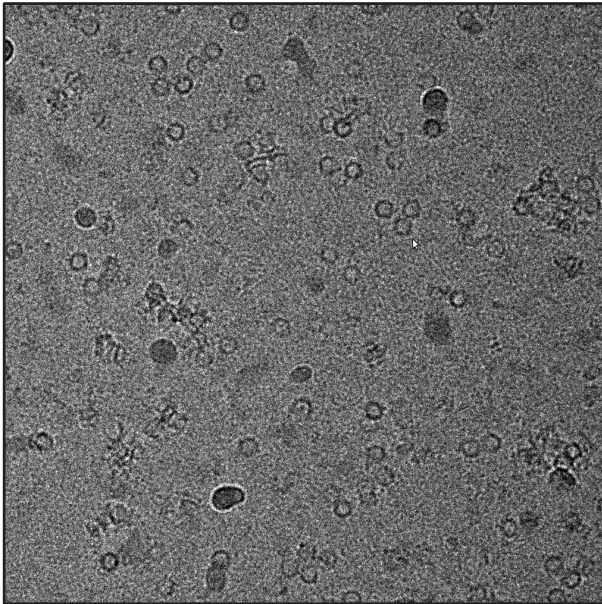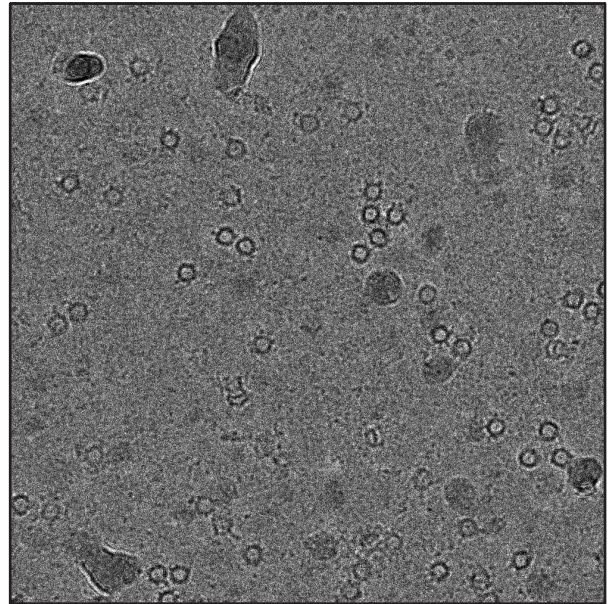

C

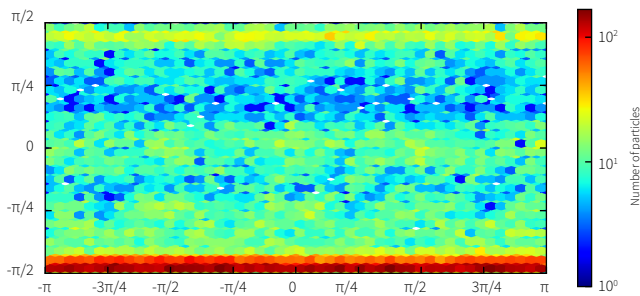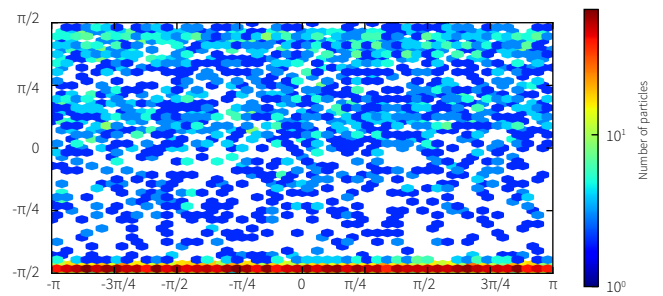

**Figure S4.** (A) Fourier Shell Correlation (FSC) plot of the final maps. Based on the FSC=0.143 criteria the maps show a resolution of 4.26 Å and 3.34 Å. (B) Example raw micrographs showing the particles. (C) Plots showing the distribution of particle orientations over the azimuth and elevation angles of the final maps.
